# Supplementary material for: Theoretical investigation on the ground state properties of the hexaamminecobalt(iii) and nitro–nitrito linkage isomerism in pentaamminecobalt(iii) in vacuo
Source: Royal Society of Chemistry journal article supplement (doi:10.1039/c7ra11603a), 2018-01-01
Supplement: c7ra11603a1.pdf [file c7ra11603a1.pdf]

**Theoretical investigation on the ground state properties of the hexaamminecobalt(III)  
and nitro-nitrito linkage isomerism in pentaamminecobalt(III) *in vacuo***

*Jules Tshishimbi Muya<sup>a\*</sup>, Hoeil Chung<sup>a\*</sup> and Sang Uck Lee<sup>b,c\*</sup>*

*<sup>a</sup>Hanyang University, Department of Chemistry, Seoul, South Korea*

*<sup>b</sup>Hanyang University, Department of Chemical & Molecular Engineering, Sangnok-gu,*

*Ansan 426-791 Korea*

*<sup>c</sup>Hanyang University, Department of Bionanotechnology, Sangnok-gu, Ansan 426-791*

*Korea*

Manuscript to be submitted to RSC Advances

Electronic supplementary information

Correspondent author:

Hoeil Chung

[hoeil@hanyang.ac.kr](mailto:hoeil@hanyang.ac.kr)

Version December 23, 2017

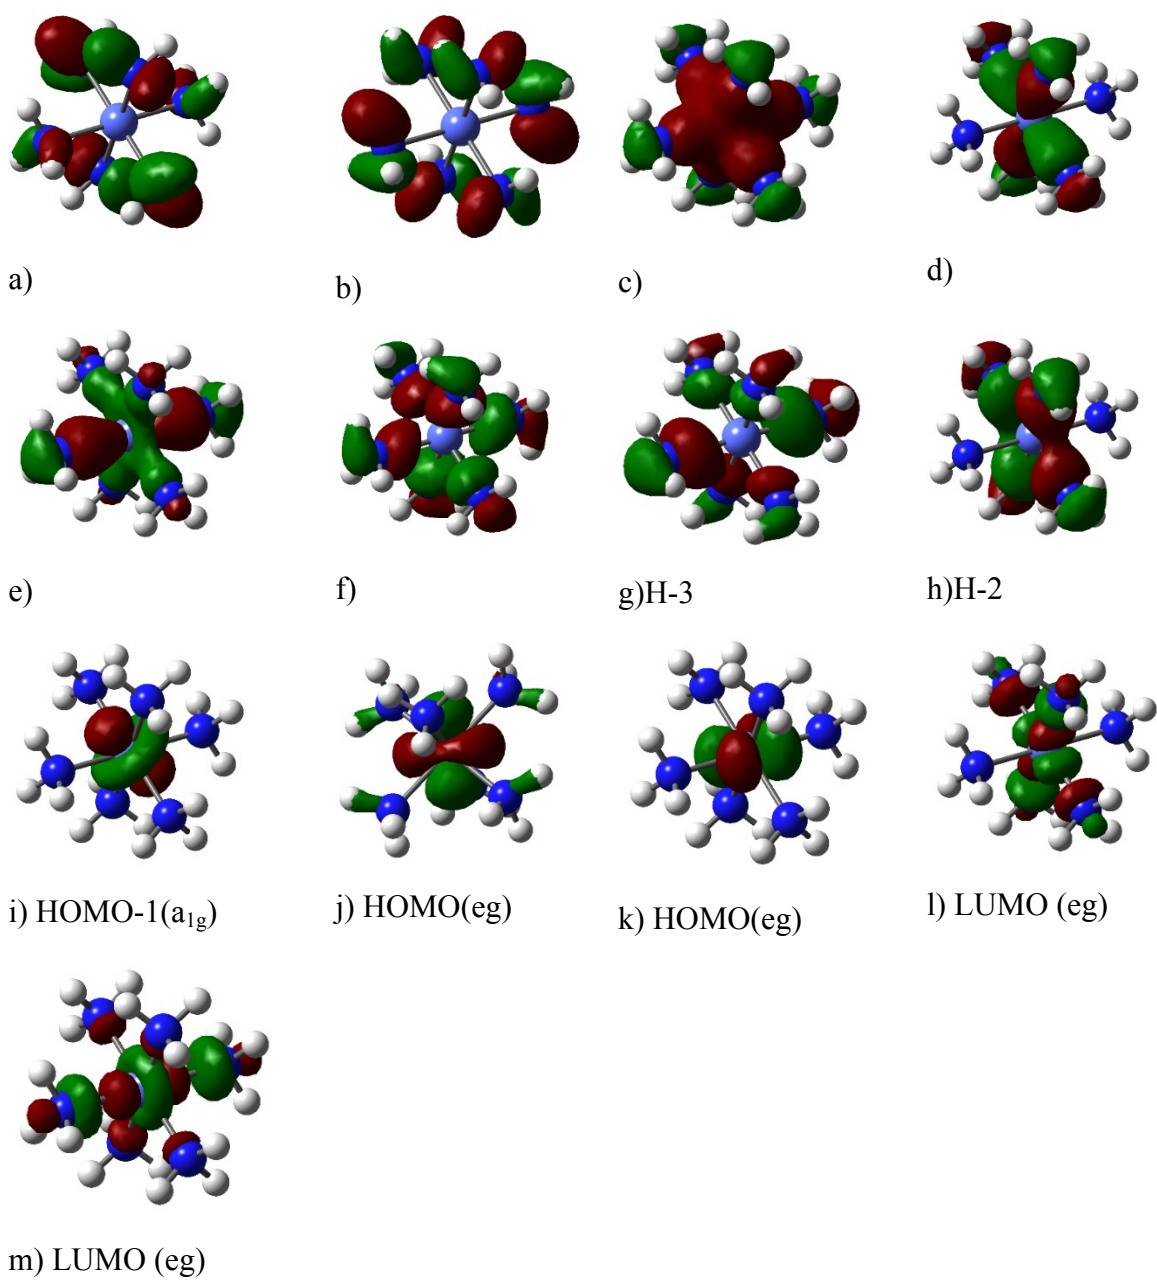

**Figure S1.** Selected valence molecular orbitals of  $D_{3d}$ - $[\text{Co}(\text{NH}_3)_6]^{3+}$  computed at wB97XD/6-31+G(d,p)

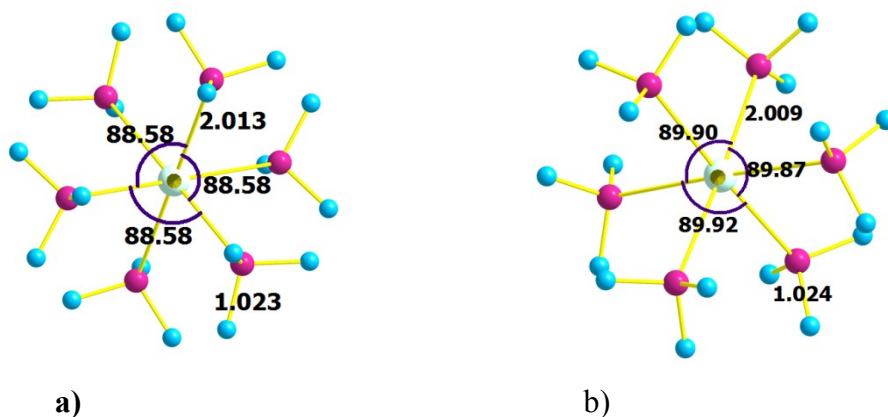

**Figure S2.** Optimized geometries of  $D_{3d}$  (a) and  $D_3$  (b) at wB97XD/6-31+G(d,p)

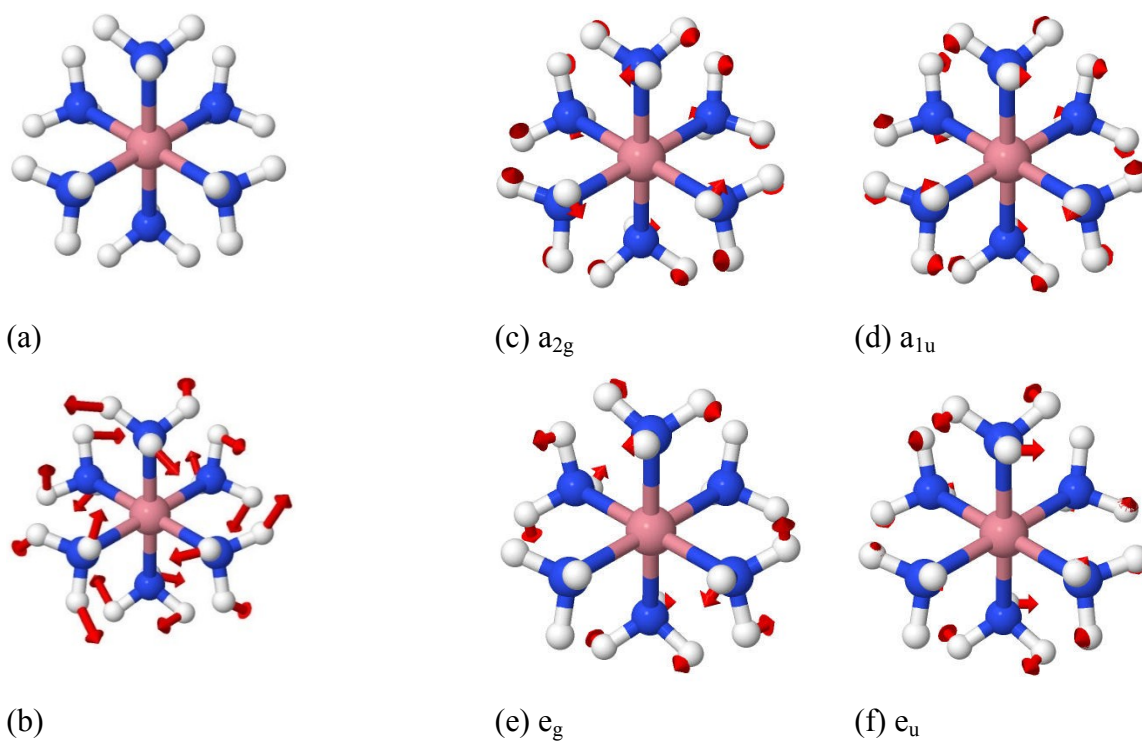

**Figure S3.** (a) Equilibrium geometry of  $\text{Co}(\text{NH}_3)_6^{3+}$  in  $D_{3d}$  symmetry, (b) distortion vector from  $D_{3d}$  to  $D_3$ , and imaginary vibrational modes of  $a_{2g}$  (c),  $a_{1u}$  (d),  $e_g$  (e) and  $e_u$  (f) symmetry

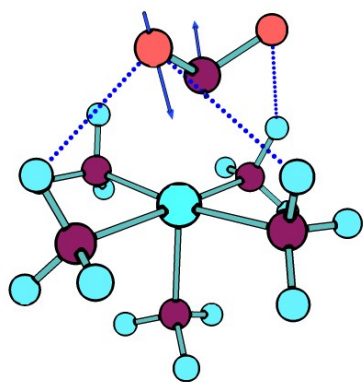

**TS1** (deformation)  
Nitro- $\rightarrow$  endo-nitrito

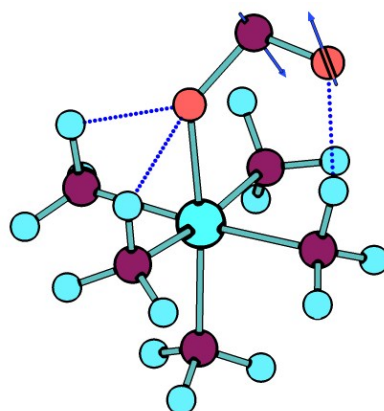

**TS2** (deformation)  
Endo-nitrito- $\rightarrow$  exo-nitrito)

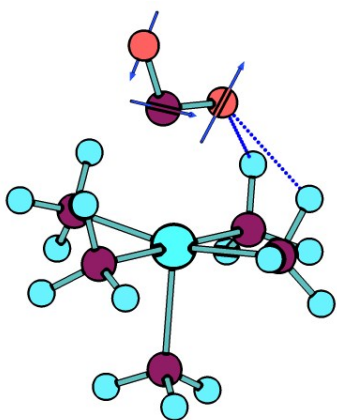

**TS3** (rotation of NO<sub>2</sub>)  
(Nitro- $\rightarrow$  exo-nitrito)

**Figure S4.** Imaginary vibrational modes of TS1-3

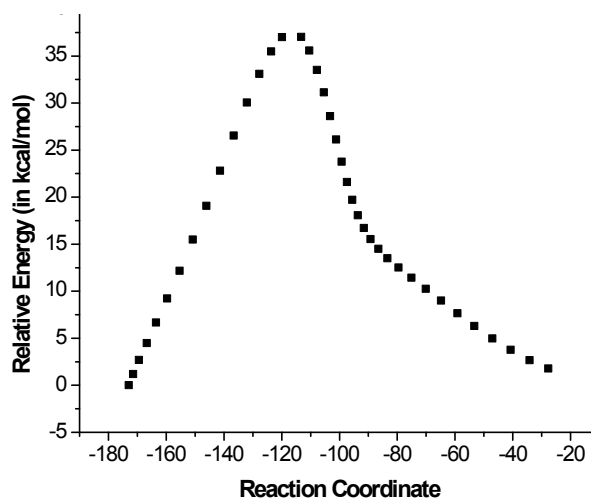

**Figure S5.** Intrinsic reaction coordinates plot of the intramolecular conversion between nitro isomer and endo-nitrito intermediate via **TS1** computed at wB97XD/6-31+G(d,p)

**Table S1.** Energies of valence molecular orbitals in Hartrees of  $D_3$  and  $D_{3d}$ - $[\text{Co}(\text{NH}_3)_6]^{3+}$  computed at B3LYP/TZVP

| $D_{3d}$  | Energies | $D_3$      | Energies |
|-----------|----------|------------|----------|
| $6a_{2u}$ | -0.8392  | 12e        | -0.8355  |
| $7e_u$    | -0.8345  | $7a_2$     | -0.8354  |
| $8a_{1g}$ | -0.8007  | $9a_1$     | -0.7992  |
| $6e_g$    | -0.7998  | <i>13e</i> | -0.7988  |
| $7e_g$    | -0.5700  | 14e        | -0.5690  |
| $9a_{1g}$ | -0.4585  | $10a_1$    | -0.4572  |
| $7a_{2u}$ | -0.4091  | 15e        | -0.4049  |
| $8e_u$    | -0.4039  | $8a_2$     | -0.4039  |

**The HOMO is in italic**

**Table S2.** Relative energies of the  $D_3$ ,  $S_6$  and  $C_{2h}$  epikernels with respect to  $D_3$  geometries computed at B3LYP,  $\omega$ B97XD and OPBE with ccpVtz.

|          | B3LYP | $\omega$ B97XD | OPBE  |
|----------|-------|----------------|-------|
| $D_3$    | -1.52 | -1.78          | -1.64 |
| $S_6$    | -1.18 | -1.35          | -1.24 |
| $C_{2h}$ | -1.16 | -1.32          | -1.21 |

**Table S3.** Imaginary frequencies of  $[\text{Co}(\text{NH}_3)_6]^{3+}$  in  $D_{3d}$  and  $C_{2h}$  and its lowest real frequencies of D3 and S6 geometries computed at B3LYP,  $\omega$ B97XD and OPBE with ccpVtz.

|          | B3LYP                                   | $\omega$ B97XD                          | OPBE                            |
|----------|-----------------------------------------|-----------------------------------------|---------------------------------|
| $D_{3d}$ | i132(a1u)+i128(a2g)<br>+i55(eg)+i19(eu) | i145(a1u)+i141(a2g)<br>+i69(eg)+i33(eu) | i135(a1u)+i131(a2g)<br>+i49(eg) |
| $D_3$    | 80 (e)                                  | 81 (e)                                  | 84(e)                           |
| $S_6$    | 40 (eu)                                 | 49 (eu)                                 | 42 (eu)                         |
| $C_{2h}$ | i61(au)+i40(bg)                         | i58(au)+i30(bg)                         | i65(au)+i38(bg)                 |

**Table. S4.** Comparison of bond lengths and angles between X-ray structure and calculated geometries of Co-NO<sub>2</sub>, exo-Co-ONO, endo-Co-ONO and TS complexes computed at  $\omega$ B97XD/6-31+G(d,p) and B3LYP/LanL2DZ[] (values of bond lengths in Å and angles in degrees).

| parameters | nitro     |                              |                     | nitrito   |                              |                     | Endo- TS1 |           |                              |
|------------|-----------|------------------------------|---------------------|-----------|------------------------------|---------------------|-----------|-----------|------------------------------|
|            | This work | Ciofini work <sup>[78]</sup> | Exp <sup>[79]</sup> | This work | Ciofini work <sup>[78]</sup> | Exp <sup>[80]</sup> | This work | This work | Ciofini work <sup>[78]</sup> |
| Co-N1      | 1.924     | 1.973                        | 1.921               | 2.776     | 2.875                        |                     | 2.930     | 2.269     | 2.382                        |
| Co-N2      | 1.997     | 2.020                        | 1.978               | 1.993     | 2.014                        | 1.913               | 1.992     | 2.008     | 2.006                        |
| Co-N3      | 2.064     | 2.062                        | 1.976               | 2.024     | 2.029                        | 1.948               | 2.031     | 1.979     | 2.031                        |
| Co-N4      | 1.995     | 2.019                        | 1.978               | 1.993     | 2.013                        | 1.968               | 1.998     | 1.997     | 2.033                        |
| Co-N5      | 1.999     | 2.021                        | 1.978               | 1.997     | 2.012                        | 1.952               | 1.999     | 1.977     | 2.005                        |
| Co-N6      | 1.997     | 2.019                        | 1.978               | 1.988     | 2.015                        | 1.954               | 1.990     | 1.994     | 2.004                        |
| Co-O2      | 2.719     | 2.804                        | -                   | 1.858     | 1.893                        | 1.927               | 1.891     | 2.346     | 2.409                        |
| N1-O2      | 1.221     | 1.272                        | 1.161               | 1.381     | 1.463                        | 1.244               | 1.318     | 1.272     | 1.344                        |

|          |        |       |       |       |       |       |       |       |       |
|----------|--------|-------|-------|-------|-------|-------|-------|-------|-------|
| N1-O3    | 1.221  | 1.272 | 1.161 | 1.175 | 1.215 | 1.037 | 1.203 | 1.217 | 1.257 |
| O2-N1-Co | 117.89 | 117.7 | 123.0 |       |       |       |       |       |       |
| O2-N1-O3 | 124.4  | 124.4 | 113.9 | 112.3 | 112.5 | 125.3 | 116.7 | 118.8 | 118.3 |
| Co-O2-N1 |        |       |       | 117.2 | 117.3 | 131.3 | 131.0 |       |       |

[78] I. Ciofini, C. Adamo, JPHYSChemA 2001, 105, 1086-1092

[79] F.A Cotton, W.T Edwards, Acta Crystallogr. B 1968, 24, 474

[80] I. Grenthe, E. Nordin, Inorg. Chem. 1979, 18, 1869

**Table S5.** Relative energies (RE in kcal/mol) of different isomers and transition states, HOMO-LUMO gap energies (H-L in eV) of Co-NO<sub>2</sub> and Co-ONO computed using different methods at 6-31+G(d,p). TS1 and TS2 are transition states

| Methods    | RE(exo) | RE(endo) | RE(TS1) | RE(TS2) | H-L   |
|------------|---------|----------|---------|---------|-------|
| CCSD(T)(a) | 2.00    | 1.12     | 43.78   | 10.76   | 13.64 |
| MP2        | 3.98    | 4.81     | 40.90   | 12.59   | 12.95 |
| B3LYP      | 4.43    | 2.25     | 40.73   | 13.40   | 4.46  |
| B3LYP-D3   | 4.42    | 1.83     | -       | 5.64    | 4.52  |
| M062X      | -0.53   | -2.77    | 36.76   | 7.00    | 7.65  |
| wB97XD     | 3.39    | 1.32     | 40.89   | 12.70   | 8.68  |

(a) CCSD(T)/6-31G(d) single point calculation from MP2/6-31+G(d,p) optimized geometry

**Table S6.** Energies of valence orbitals in Hartrees of the nitro/nitrito linkage isomers computed at wB97XD/6-31+G(d,p)

| Orbitals | Co-NO <sub>2</sub> | exo-Co-ONO | endo-Co-ONO |
|----------|--------------------|------------|-------------|
| L+3      | -0.24467           | -0.24246   | -0.24311    |
| L+2      | -0.26644           | -0.24388   | -0.25377    |
| L+1      | -0.31722           | -0.30936   | -0.31871    |
| L        | -0.31968           | -0.31741   | -0.31964    |
| H        | -0.63876           | -0.59813   | -0.61054    |
| H-1      | -0.66656           | -0.65652   | -0.67549    |
| H-2      | -0.67931           | -0.68464   | -0.68020    |
| H-3      | -0.72491           | -0.72708   | -0.72869    |
| H-4      | -0.72828           | -0.72858   | -0.73044    |
| H-5      | -0.73013           | -0.73434   | -0.73698    |
| H-6      | -0.76630           | -0.76118   | -0.76295    |

The HOMO (H) and LUMO (L) are in italic

**Table S7.** Topological properties of the electron density of Co-NO<sub>2</sub> and Co-ONO : electron densities and their Laplacian in parenthesis at different bond critical points in Co-complexes computed at wB97XD/6-31+G(d,p).

| Bonds              | Co-NO <sub>2</sub> | Exo-Co-ONO    | Endo-Co-ONO   |
|--------------------|--------------------|---------------|---------------|
| Co-NH <sub>3</sub> | 0.088(-0.108)      | 0.090(-0.109) | 0.090(-0.107) |
| Co-N               | 0.118(-0.106)      | -             | -             |
| Co-O               | -                  | 0.116(-0.154) | 0.104(-0.136) |
| ON-O               | 0.501(0.263)       | 0.561(0.392)  | 0.523(0.339)  |
| (Co)O-N            | 0.499(0.261)       | 0.340(0.102)  | 0.399(0.163)  |
| N-H                | 0.331(0.448)       | 0.329(0.445)  | 0.331(0.448)  |
| N...H              |                    | 0.022(-0.018) | -             |
| NO...H             | 0.019(-0.018)      | -             | 0.022(-0.017) |
| O...N              | -                  | -             |               |



## Gaussian09 outputs of D<sub>3</sub> and D<sub>3d</sub>-Co(NH<sub>3</sub>)<sub>6</sub><sup>3+</sup> calculations at CCSD(T) and BD(T) levels

(Enter /usr/local/gaussian/g09D01/g09/19999.exe)

```
1\G\GINC-QUANTUM33\SP\RCCSD(T)-FC\6-31+G(d,p)\Co1H18N6(3+)\JMUYA\09-May-2016\0\#P ccsd-t/6-31+G(d,p) symm=loose\title\3,1\Co,0,0.,0.,0.\N,0,1.390677702,0.85644291,-1.156462665\N,0,0.046362466,-1.632583673,-1.156462665\N,0,-1.437040168,0.776140763,-1.156462665\N,0,-1.437040168,-0.776140763,1.156462665\N,0,0.046362466,1.632583673,1.156462665\N,0,1.390677702,-0.85644291,1.156462665\H,0,1.52323731,0.418728808,-2.073164\H,0,1.190998338,1.836474168,-1.378596498\H,0,2.334081969,0.887612993,-0.758916332\H,0,-0.39898887,-1.528526611,-2.073168164\H,0,0.994934114,-1.9496719,-1.378596498\H,0,-0.398345583,-2.465180776,-0.758916332\H,0,-2.185932451,0.113197732,-1.378596498\H,0,-1.935736385,1.577567783,-0.758916332\H,0,-1.12424844,1.109797802,-2.073168164\H,0,-1.935736385,-1.577567783,0.758916332\H,0,-1.12424844,-1.109797802,2.073168164\H,0,-2.185932451,-0.113197732,1.378596498\H,0,-0.398345583,2.465180776,0.758916332\H,0,-0.39898887,1.528526611,2.073168164\H,0,0.994934114,1.9496719,1.378596498\H,0,1.190998338,-1.836474168,1.378596498\H,0,2.334081969,-0.887612993,0.758916332\H,0,1.52323731,-0.418728808,2.073168164\Version=ES64L-G09RevD.01\State=1-A1\HF=-1717.4954481\MP2=-1718.8880972\MP3=-1718.9224761\MP4D=-1718.9601737\MP4DQ=-1718.9416767\MP4SDQ=-1718.9808716\CCSD=-1718.9834351\CCSD(T)=-1719.0362302\RMSD=2.646e-09\P G=D03 [O(Co1),X(H18N6)]\@
```

HE THAT WALD REACHE THE SWEITE ROSE

SULD NOW AND THEN BE SCRATCHED WT THE SCHARPE BREERES.

-- PROVERBS AND REASONS OF THE YEAR 1585

AS REPRINTED IN PAISLEY MAGAZINE 1828.

Job cpu time: 0 days 8 hours 23 minutes 14.5 seconds.

File lengths (MBytes): RWF= 7975 Int= 0 D2E= 0 Chk= 4 Scr= 1

Normal termination of Gaussian 09 at Mon May 9 05:34:18 2016.

(Enter /usr/local/gaussian/g09D01/g09/19999.exe)

```
1\1\GINC-QUANTUM04\SP\RCCSD(T)-FC\6-31+G(d,p)\Co1H18N6(3+)\JMUYA\09-May-2016\0\#P ccsd-t/6-31+G(d,p) symm=loose\title\3,1\Co,0,0.,0.,0.\N
,0,0.,1.617737548,1.181828667\N,0,-1.401001814,-0.808868774,1.18182866
7\N,0,1.401001814,-0.808868774,1.181828667\N,0,0.,-1.617737548,-1.1818
28667\N,0,1.401001814,0.808868774,-1.181828667\N,0,-1.401001814,0.8088
68774,-1.181828667\H,0,0.,1.410828064,2.184536\H,0,0.807748578,2.23698
5549,1.068027\H,0,-0.807748578,2.236985549,1.068027\H,0,-1.221812944,-
0.705414032,2.184536\H,0,-2.341160602,-0.418961986,1.068027\H,0,-1.533
412024,-1.818023563,1.068027\H,0,1.533412024,-1.818023563,1.068027\H,0
,2.341160602,-0.418961986,1.068027\H,0,1.221812944,-0.705414032,2.1845
36\H,0,-0.807748578,-2.236985549,-1.068027\H,0,0.,-1.410828064,-2.1845
36\H,0,0.807748578,-2.236985549,-1.068027\H,0,2.341160602,0.418961986,
-1.068027\H,0,1.221812944,0.705414032,-2.184536\H,0,1.533412024,1.8180
23563,-1.068027\H,0,-2.341160602,0.418961986,-1.068027\H,0,-1.53341202
4,1.818023563,-1.068027\H,0,-1.221812944,0.705414032,-2.184536\Versio
n=ES64L-G09RevD.01\State=1-A1G\HF=-1717.4924952\MP2=-1718.884245\MP3=-
1718.9189593\MP4D=-1718.9566107\MP4DQ=-1718.9381087\MP4SDQ=-1718.97730
2\CCSD=-1718.9800145\CCSD(T)=-1719.032816\RMSD=2.525e-09\PG=D03D [O(Co
1),3SGD(H2N2),X(H12)]\@
```

UPON JULIA'S CLOTHES

WHENAS IN SILKS MY JULIA GOES,

THEN, THEN, METHINKS, HOW SWEETLY FLOWS

THAT LIQUEFACTION OF HER CLOTHES.

NEXT, WHEN I CAST MINE EYES, AND SEE

THAT BRAVE VIBRATION, EACH WAY FREE,

O, HOW THAT GLITTERING TAKETH ME!

-- ROBERT HERRICK, 1648

Job cpu time: 0 days 3 hours 51 minutes 46.2 seconds.

File lengths (MBytes): RWF= 3988 Int= 0 D2E= 0 Chk= 4 Scr= 1

Normal termination of Gaussian 09 at Mon May 9 05:01:13 2016.

(Enter /usr/local/gaussian/g09D01/g09/19999.exe)

```
I\GINC-QUANTUM28\SP\RBD(T,FC)\6-31+G(d,p)\Co1H18N6(3+)\JMUYA\09-Jun-2016\0\#P BD(T)/6-31+G(d,p) symm=loose\title\3,I\Co,0,0.,0.,0.\N,0,0.,1.617737548,1.181828667\N,0,-1.401001814,-0.808868774,1.181828667\N,0,1.401001814,-0.808868774,1.181828667\N,0,0.,-1.617737548,-1.181828667\N,0,1.401001814,0.808868774,-1.181828667\N,0,-1.401001814,0.808868774,-1.181828667\H,0,0.,1.410828064,2.184536\H,0,0.807748578,2.236985549,1.068027\H,0,-0.807748578,2.236985549,1.068027\H,0,-1.221812944,-0.705414032,2.184536\H,0,-2.341160602,-0.418961986,1.068027\H,0,-1.533412024,-1.818023563,1.068027\H,0,1.533412024,-1.818023563,1.068027\H,0,2.341160602,-0.418961986,1.068027\H,0,1.221812944,-0.705414032,2.184536\H,0,-0.807748578,-2.236985549,-1.068027\H,0,0.,-1.410828064,-2.184536\H,0,0.807748578,-2.236985549,-1.068027\H,0,2.341160602,0.418961986,-1.068027\H,0,1.221812944,0.705414032,-2.184536\H,0,1.533412024,1.818023563,-1.068027\H,0,-2.341160602,0.418961986,-1.068027\H,0,-1.533412024,1.818023563,-1.068027\H,0,-1.221812944,0.705414032,-2.184536\\Version=E S64L-G09RevD.01\State=1-A1G\HF=-1717.4924952\MP2=-1718.884245\MP3=-1718.9189593\MP4D=-1718.9566107\MP4DQ=-1718.9381087\BDRef=-1717.4328454\BD=-1718.9713181\BD(T)=-1719.0320755\RMSD=2.524e-09\PG=D03D [O(Co1),3SGD(H2N2),X(H12)]\@
```

THEORY: SUPPOSITION WHICH HAS SCIENTIFIC BASIS,

BUT NOT EXPERIMENTALLY PROVEN.

FACT: A THEORY WHICH HAS BEEN PROVEN BY ENOUGH

MONEY TO PAY FOR THE EXPERIMENTS.

-- THE WIZARD OF ID

Job cpu time: 0 days 6 hours 25 minutes 5.2 seconds.

File lengths (MBytes): RWF= 6222 Int= 0 D2E= 0 Chk= 5 Scr= 1

Normal termination of Gaussian 09 at Thu Jun 9 02:40:38 2016.

Leave Link 601 at Thu Jun 9 03:08:20 2016, MaxMem= 1610612736 cpu: 1.0

(Enter /usr/local/gaussian/g09D01/g09/19999.exe)

I\GINC-QUANTUM15\SP\RBD(T,FC)\6-31+G(d,p)\Co1H18N6(3+)\JMUYA\09-Jun-

2016\0\#P BD(T)/6-31+G(d,p) symm=loose\title\3,I\Co,0,0.,0.,0.\N,0,

1.390677702,0.85644291,-1.156462665\N,0,0.046362466,-1.632583673,-1.15

6462665\N,0,-1.437040168,0.776140763,-1.156462665\N,0,-1.437040168,-0.

776140763,1.156462665\N,0,0.046362466,1.632583673,1.156462665\N,0,1.39

0677702,-0.85644291,1.156462665\H,0,1.52323731,0.418728808,-2.07316816

4\H,0,1.190998338,1.836474168,-1.378596498\H,0,2.334081969,0.887612993

, -0.758916332\H,0,-0.39898887,-1.528526611,-2.073168164\H,0,0.99493411

4,-1.9496719,-1.378596498\H,0,-0.398345583,-2.465180776,-0.758916332\H

,0,-2.185932451,0.113197732,-1.378596498\H,0,-1.935736385,1.577567783,

-0.758916332\H,0,-1.12424844,1.109797802,-2.073168164\H,0,-1.935736385

, -1.577567783,0.758916332\H,0,-1.12424844,-1.109797802,2.073168164\H,0

, -2.185932451,-0.113197732,1.378596498\H,0,-0.398345583,2.465180776,0.

758916332\H,0,-0.39898887,1.528526611,2.073168164\H,0,0.994934114,1.94

96719,1.378596498\H,0,1.190998338,-1.836474168,1.378596498\H,0,2.33408

1969,-0.887612993,0.758916332\H,0,1.52323731,-0.418728808,2.073168164\

\Version=ES64L-G09RevD.01\State=1-A1\HF=-1717.4954481\MP2=-1718.888097

2\MP3=-1718.9224761\MP4D=-1718.9601737\MP4DQ=-1718.9416767\BDRRef=-1717

.4360641\BD=-1718.9747775\BD(T)=-1719.0355082\RMSD=2.645e-09\PG=D03 [O

(Co1),X(H18N6)]\@

GARBAGE IN, GARBAGE OUT

Job cpu time: 0 days 14 hours 46 minutes 29.9 seconds.

File lengths (MBytes): RWF= 11680 Int= 0 D2E= 0 Chk= 5 Scr= 1

Normal termination of Gaussian 09 at Thu Jun 9 03:08:22 2016.
